# Supplementary material for: Quantifying neptunium oxidation states in nitric acid through spectroelectrochemistry and chemometrics
Source: Frontiers journal article supplement (doi:10.3389/fnuen.2023.1323372), 2023-12-07
Supplement: Table_1.DOCX [file Table_1.DOCX]

**Table 1.** Characteristic Np absorption bands by oxidation state

| **Oxidation state** | **Primary absorption bands (nm)** |
| --- | --- |
| Np(III) | 555, 601, 658, 782, 847, 979, 1,355 |
| Np(IV) | 494, 522, 700, 714, 802, 933, 953, 972, 1,138 |
| Np(V) | 476, 616, 980, 1,097 |
| Np(VI) | 557, 1,223 |

**Table 2.** Prediction statistics for the KS-PLS2 model and M-PLS-2 models

| **KS CAL model** | **Np(VI)** | **Np(V)** | **Np(IV)** | **Np(III)** |
| --- | --- | --- | --- | --- |
| RMSEP | 0.0050 | 0.0115 | 0.0110 | 0.0045 |
| SEP | 0.0047 | 0.0117 | 0.0114 | 0.0047 |
| Bias | 0.00205 | −0.00196 | 0.000163 | −0.00043 |
| **M-PLS-2 model** | **Np(VI)** | **Np(V)** | **Np(IV)** | **Np(III)** |
| RMSEP | 0.0064 | 0.0131 | 0.0125 | 0.0074 |
| SEP | 0.0065 | 0.0131 | 0.0129 | 0.0075 |
| Bias | 0.00113 | 0.003241 | −0.00589 | −0.00153 |

Figures





**Figure 1.** Np(III/IV/V/VI) absorption spectra generated from the sequential step from Np(VI) to Np(III): (a) Vis, (b) NIR, and (c) fused spectra.


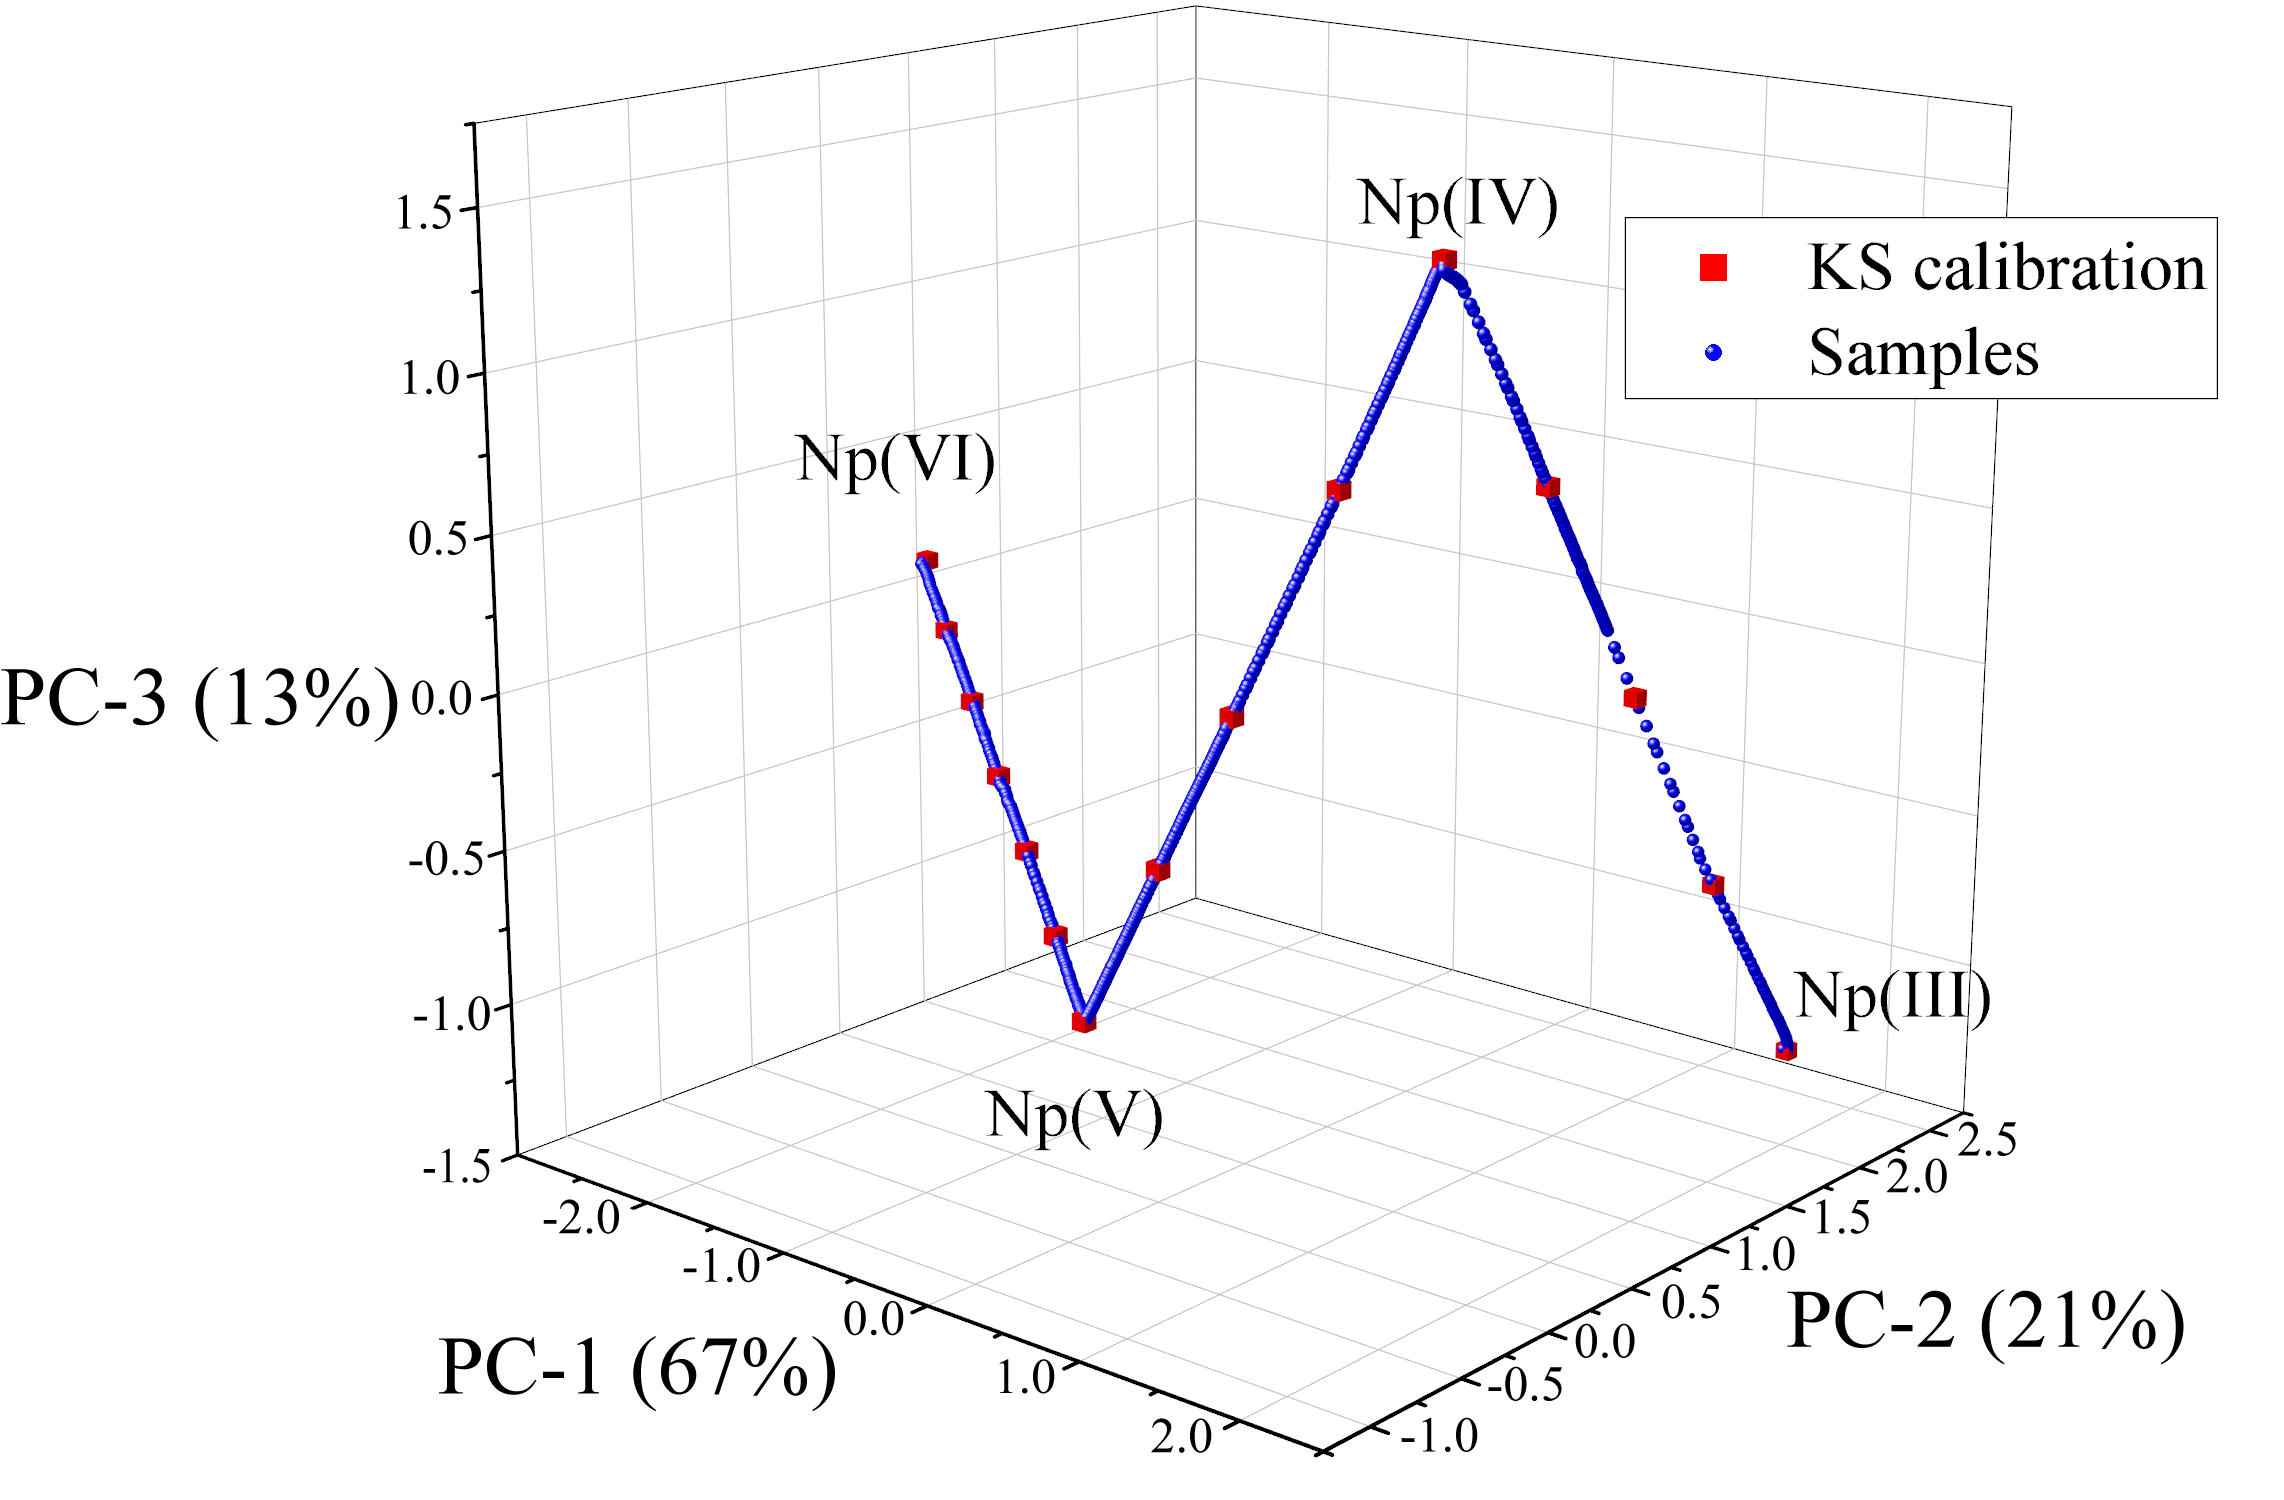


**Figure 2.** 3D scatter plot of the scores for principal component (PC)-1, PC-2, and PC-3. Sample selected by the KS algorithm are shown as the red squares. Location of pure Np oxidation states are noted as the end points and vertex points.





**Figure 3.** PLS-2 regression model parity plots (Factor-3) for the calibration and cross validation data from the KS-selected NIR spectra for the normalized concentrations of (a) Np(VI), (b) Np(V), (c) Np(IV), and (d) Np(III).

**

**

**Figure 4.** Comparing PLSR model Np(VI), Np(V), Np(IV), and Np(III) normalized concentration predictions by (a) KS-PLS2-NIR model and (b) M-PLS-2 model.

**

**

**Figure 5.** PLSR predictions during the oxidizing scan from Np(III) to Np(VI).
